# Supplementary material for: Short report: Introduction of chikungunya virus ECSA genotype into the Brazilian Midwest and its dispersion through the Americas
Source: PubMed Central journal article supplement (PMC8051810; doi:10.1371/journal.pntd.0009290), 2021-04-16

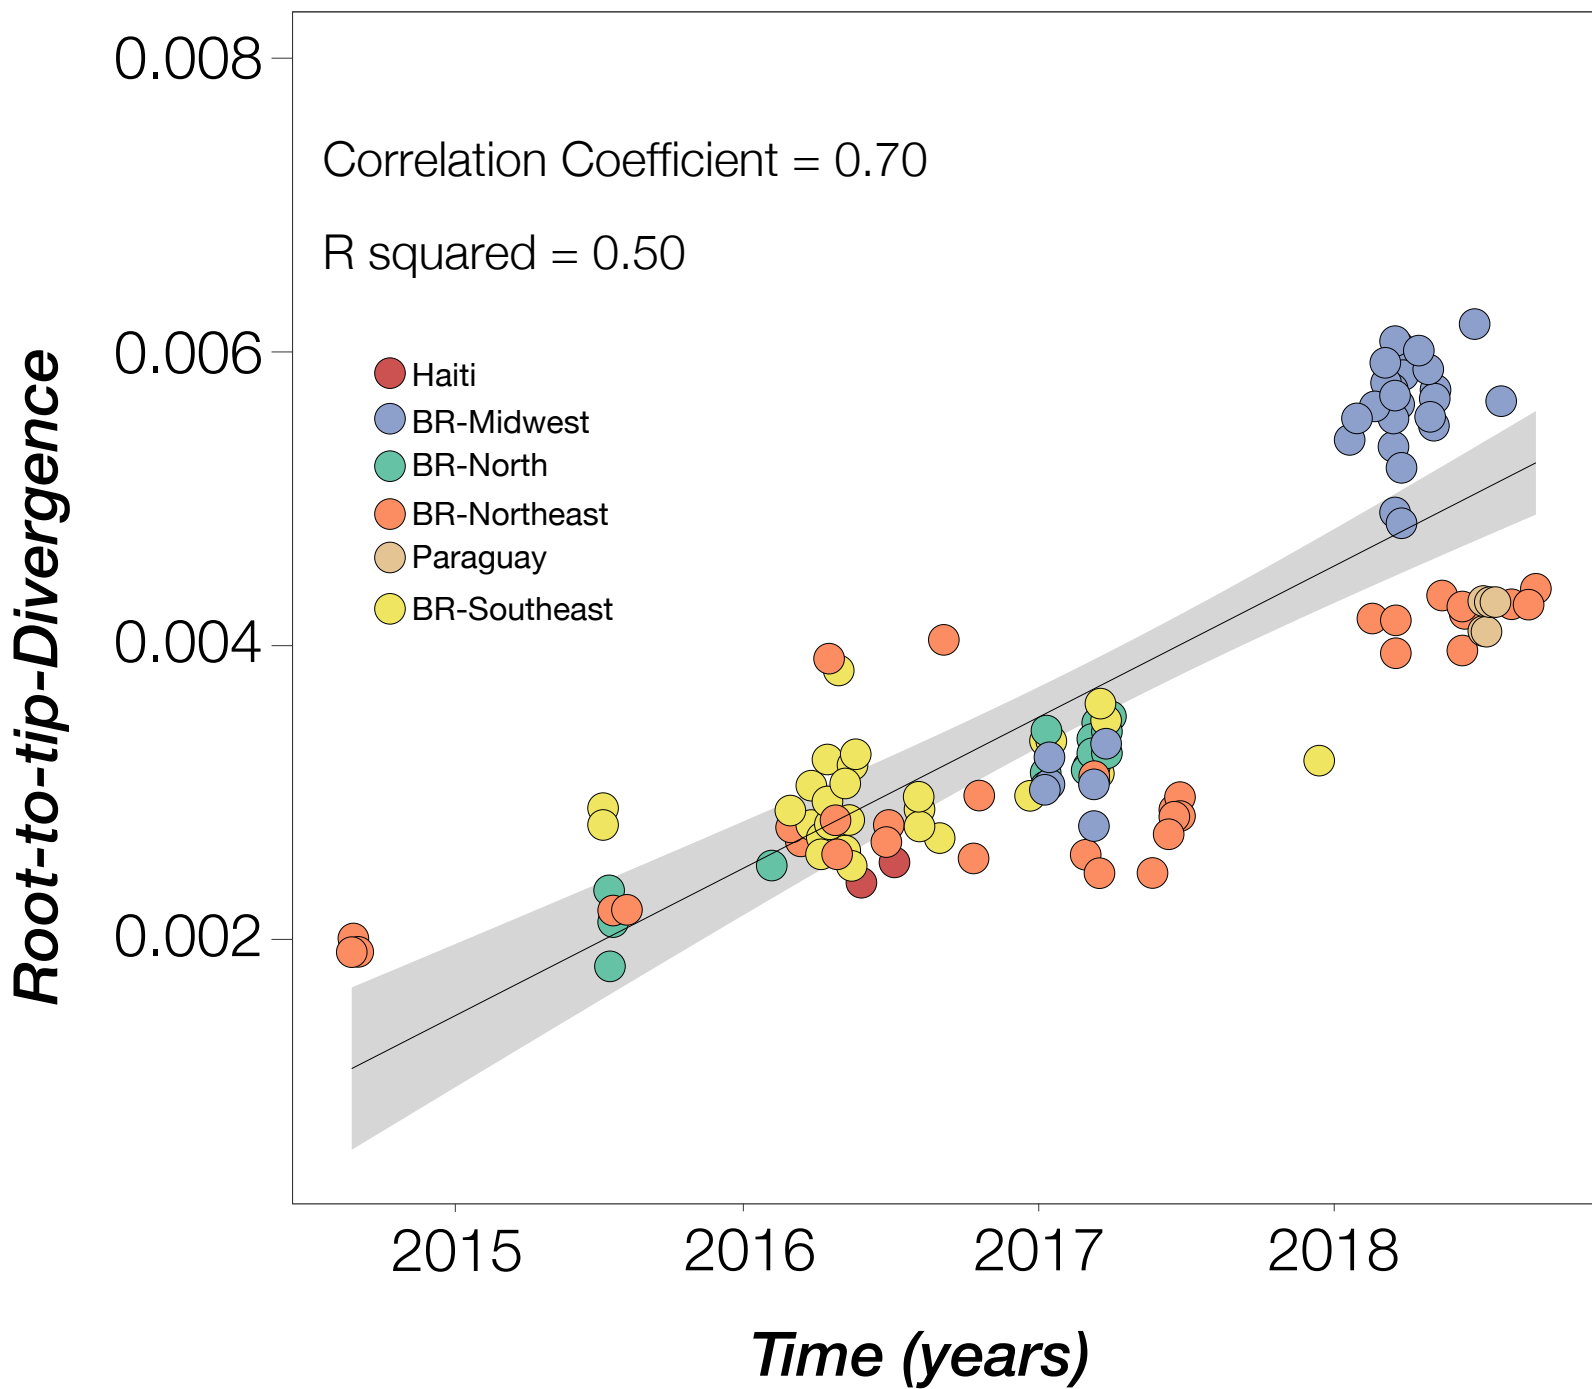

Supplement: pntd.0009290.s001.pdf [file pntd.0009290.s001.pdf]
